# Supplementary material for: Integrated Multi-Omics Techniques and Network Pharmacology Analysis to Explore the Material Basis and Mechanism of Simiao Pill in the Treatment of Rheumatoid Arthritis
Source: PubMed Central journal article supplement — ACS Omega. 2023 Mar 20;8(12):11138–50. doi: 10.1021/acsomega.2c07959 (PMC10061593; doi:10.1021/acsomega.2c07959), 2023-03-20
Supplement: ao2c07959_si_001.pdf [file ao2c07959_si_001.pdf]

**Supporting Information:**

**Integrated Multi-omics techniques and Network Pharmacology  
Analysis to Explore the Material Basis and Mechanism of Simiao Pill  
in the Treatment of Rheumatoid Arthritis**

**Yuming Wang<sup>†</sup>, Fangfang Zhang<sup>†</sup>, Xiaokai Li<sup>†</sup>, Xue Li, Jiayi Wang, Junjie He,  
Xiaoyan Wu, Siyu Chen, Yanjun Zhang<sup>\*</sup>, Yubo Li<sup>\*</sup>**

School of Chinese Materia Medica, Tianjin University of Traditional Chinese  
Medicine, Tianjin, 301617, China

**\*Co-corresponding authors:**

Dr. Yubo Li, School of Chinese Materia Medica, Tianjin University of Traditional  
Chinese Medicine, No. 10 Poyang Lake Road, West Zone, Tuanbo New City, Jinghai  
District, Tianjin 301617, China. E-mail: yaowufenxi001@sina.com.

Dr. Yanjun Zhang, School of Chinese Materia Medica, Tianjin University of  
Traditional Chinese Medicine, No. 10 Poyang Lake Road, West Zone, Tuanbo New  
City, Jinghai District, Tianjin 301617, China. E-mail: Tianjin\_tcm001@sina.com.

**†Author contribution**

Yuming Wang, Fangfang Zhang and Xiaokai Li contributed equally to this work.

**Table S1. Information on blood-inlet components in Simiao pills**

| No. | Molecular Name | Herb                                | PubChem CID | Molecular Formula                                             | MW     |
|-----|----------------|-------------------------------------|-------------|---------------------------------------------------------------|--------|
| 1   | Berberine      | Phellodendron chinense<br>Schneid.  | 2353        | C <sub>20</sub> H <sub>18</sub> NO <sub>4</sub>               | 336.4  |
| 2   | Palmatine      | Phellodendron chinense<br>Schneid.  | 19009       | C <sub>21</sub> H <sub>22</sub> NO <sub>4</sub>               | 352.4  |
| 3   | Lotusine       | Phellodendron chinense<br>Schneid.  | 5274587     | C <sub>19</sub> H <sub>24</sub> NO <sub>3</sub> <sup>+</sup>  | 314.4  |
| 4   | Berberrubine   | Phellodendron chinense<br>Schneid.  | 72703       | C <sub>19</sub> H <sub>16</sub> NO <sub>4</sub>               | 357.8  |
| 5   | Dauricine      | Phellodendron chinense<br>Schneid.  | 73400       | C <sub>38</sub> H <sub>44</sub> N <sub>2</sub> O <sub>6</sub> | 624.8  |
| 6   | Beta-Eudesmol  | Atractylodes lancea<br>(Thunb.) DC. | 91457       | C <sub>15</sub> H <sub>26</sub> O                             | 222.37 |
| 7   | Atractylodin   | Atractylodes lancea<br>(Thunb.) DC. | 5321047     | C <sub>13</sub> H <sub>1</sub> O                              | 182.2  |
| 8   | Magnoflorine   | Phellodendron chinense<br>Schneid.  | 73337       | C <sub>20</sub> H <sub>24</sub> NO <sub>4</sub>               | 342.4  |
| 9   | Phellodendrine | Phellodendron chinense<br>Schneid.  | 3081405     | C <sub>20</sub> H <sub>24</sub> NO <sub>4</sub>               | 342.4  |

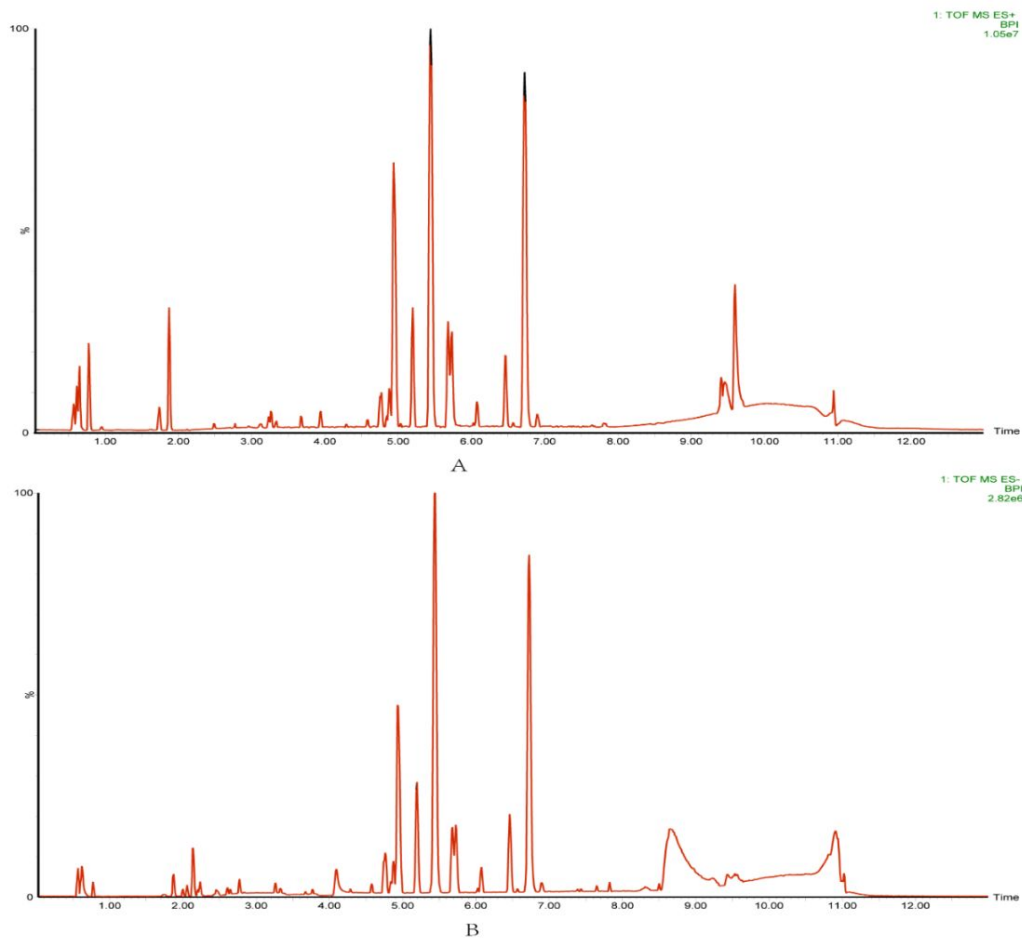

**Figure S1. BPI diagram of plasma QC samples (A:Positive ion mode; B:Negative ion mode)**

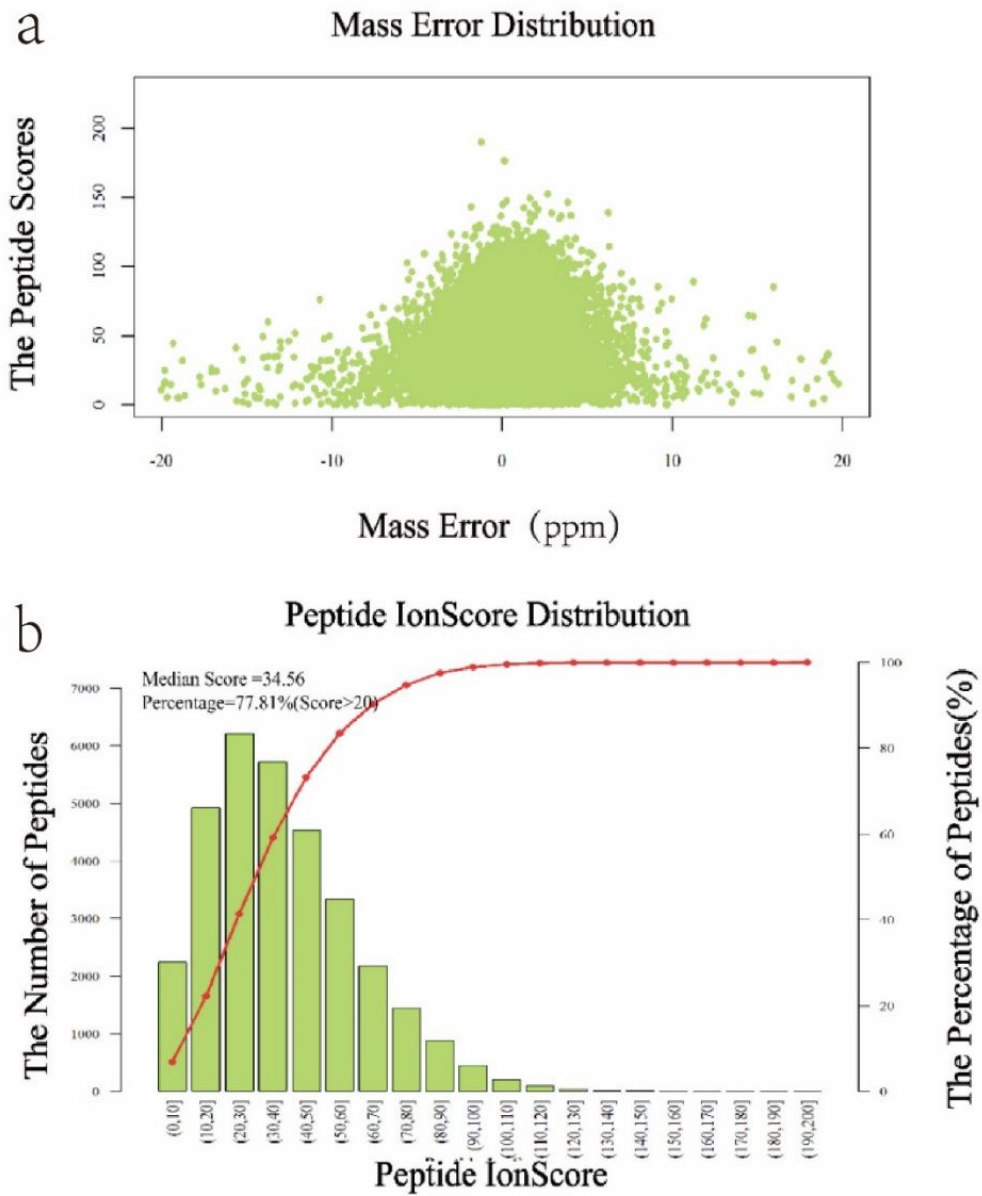

**Figure S2. Proteomics analysis. a: Biased mass distribution of peptide ions; b: Peptide ion score profiles**

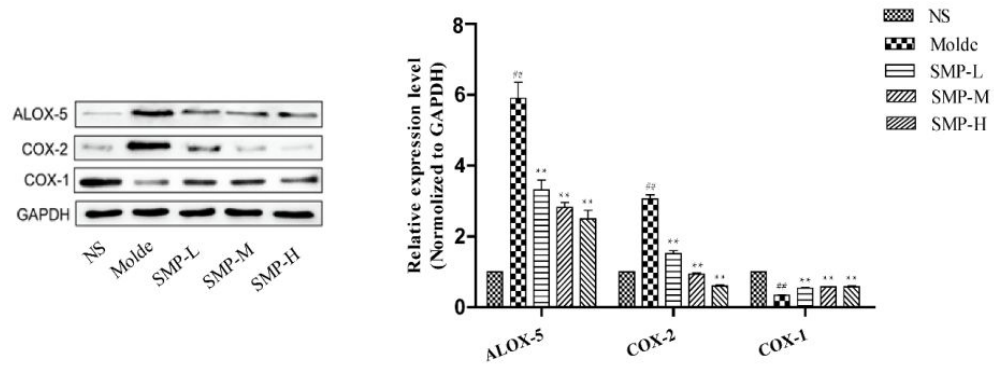

**Figure S3. Protein expression levels of ALOX-5, COX-2 and COX-1 genes( $n=3$ )**  
 ( $\#p<0.05$ ,  $\#\#p<0.01$  compared with control group,  $*p<0.05$ ,  $**p<0.01$  compared with model)

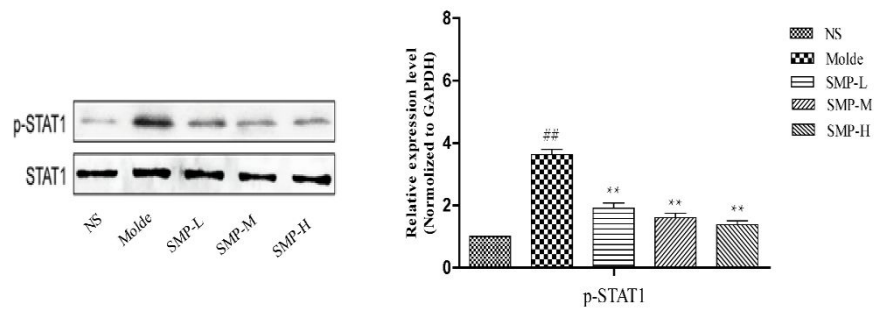

**Figure S4. Protein expression levels of P-STAT1 genes( $n=3$ )**  
 ( $\#p<0.05$ ,  $\#\#p<0.01$  compared with control group,  $*p<0.05$ ,  $**p<0.01$  compared with model)

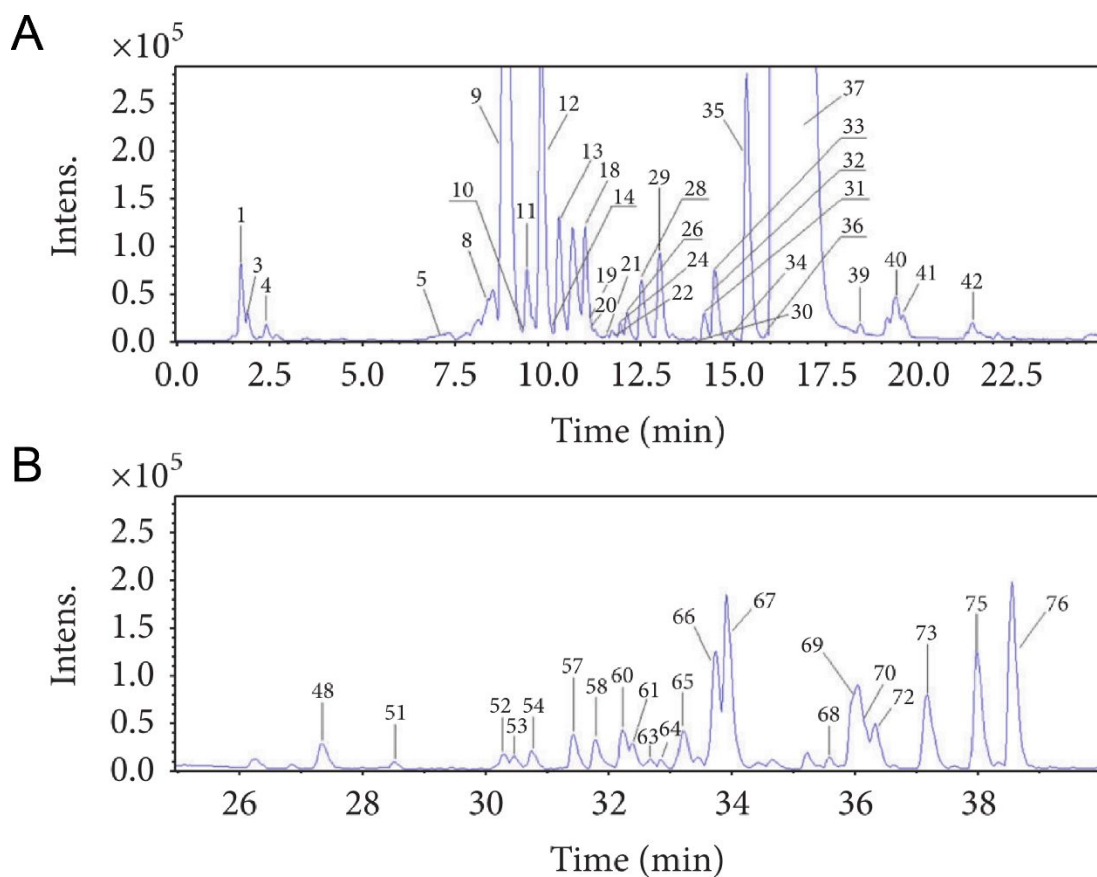

**Figure S5. Base peak chromatograms obtained by HPLC/Q-TOF-MS in the positive mode of SMP. (Chromatograms at 0 to 25 min: (A); Chromatogram at 25–40 min: (B))**

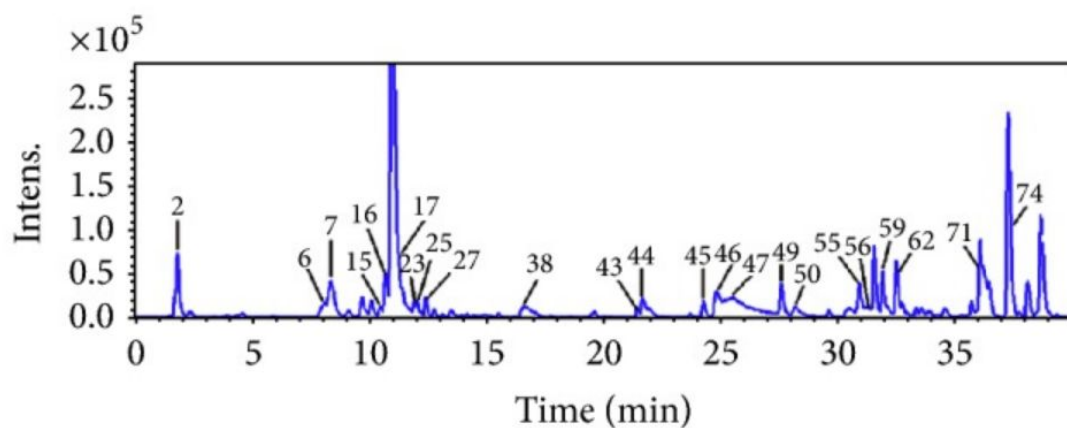

**Figure S6. Base peak chromatograms obtained by HPLC/Q-TOF-MS in the negative mode of SMP**
